# Supplementary material for: Versatile electronic properties of atomically layered ScO2
Source: Royal Society of Chemistry journal article supplement (doi:10.1039/c5tc01096a), 2015-01-01
Supplement: c5tc01096a1.pdf [file c5tc01096a1.pdf]

Supporting Information

For

## Versatile Electronic Properties of Atomically Layered $\text{ScO}_2$

G.C. Loh <sup>a,b\*</sup> and Ravindra Pandey <sup>a\*</sup>

<sup>a</sup>Department of Physics, Michigan Technological University, Houghton, Michigan 49931, USA

<sup>b</sup>Institute of High Performance Computing, 1 Fusionopolis Way, #16-16 Connexis, Singapore 138632

### A. Spin-Polarized Atom-Projected Band Structures of T- and H- $\text{ScO}_2$ Monolayers at different Hubbard $U$ & $J$ Parameters

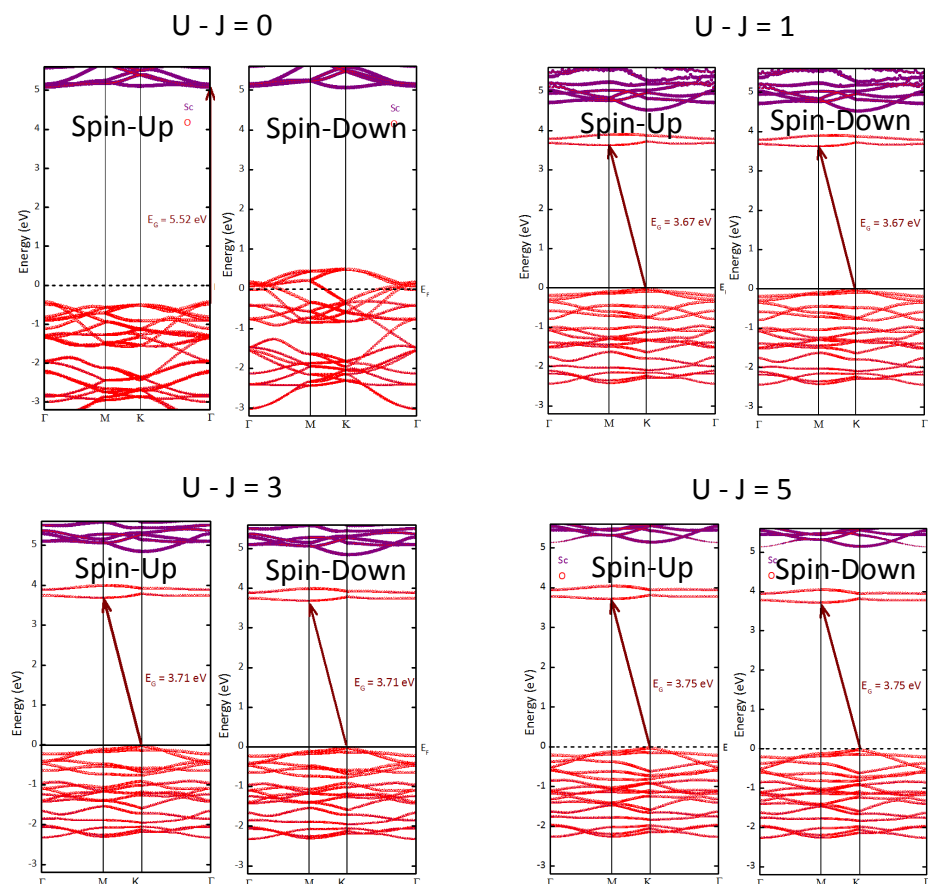

Figure S1. Spin-polarized atom-projected band structure of T-ScO<sub>2</sub> monolayer at different U-J parameters. The size of the data points indicates the spectral weight. Zero is taken to be Fermi energy.

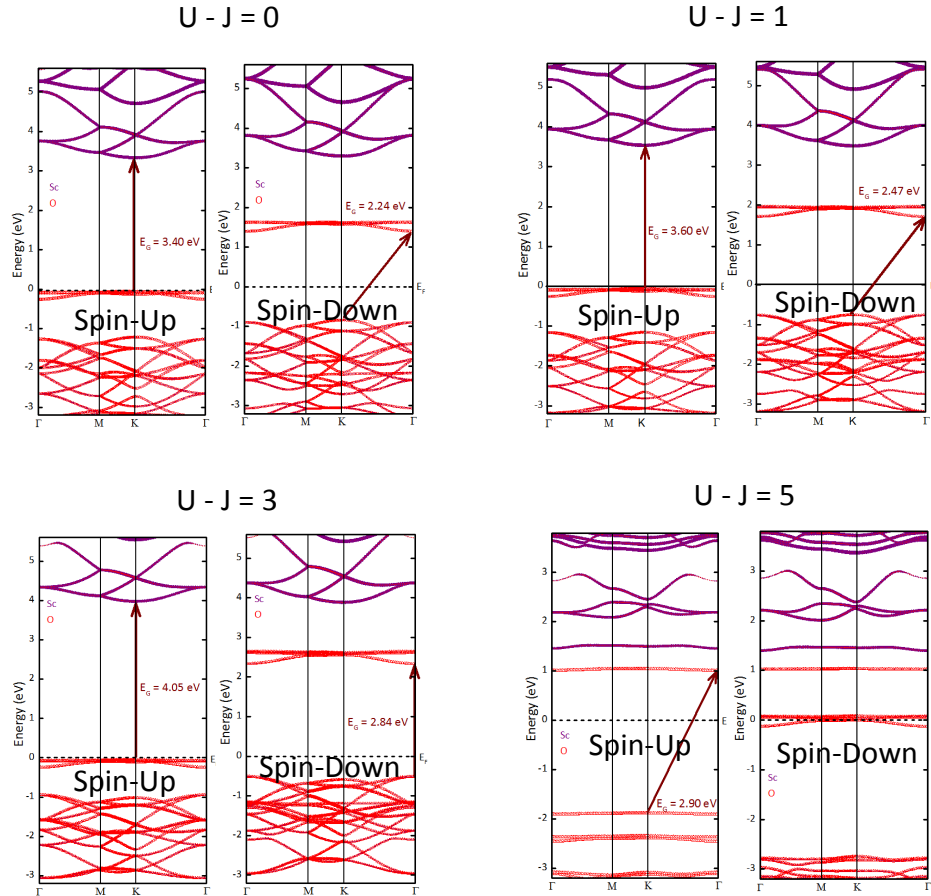

Figure S2. Spin-polarized atom-projected band structure of H-ScO<sub>2</sub> monolayer at different U-J parameters. The size of the data points indicates the spectral weight. Zero is taken to be Fermi energy.

## B. Atom-Projected Band Structures of T-ScO<sub>2</sub> Monolayer, T-ScO<sub>2</sub> Bilayer, H-ScO<sub>2</sub> Monolayer & H-ScO<sub>2</sub> Monolayer

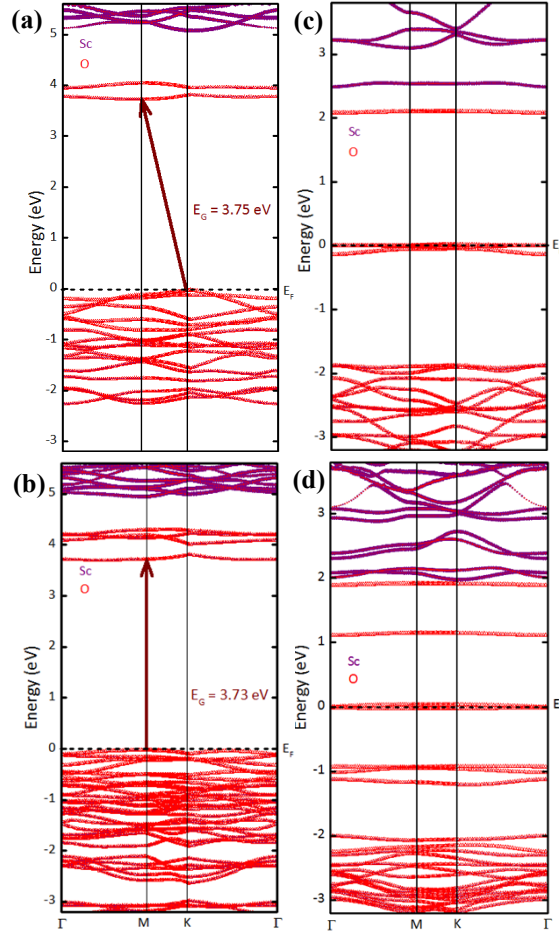

Figure S3. Atom-projected band structure of (a) T-ScO<sub>2</sub> monolayer, (b) T-ScO<sub>2</sub> bilayer, (c) H-ScO<sub>2</sub> monolayer, and (d) H-ScO<sub>2</sub> bilayer. Points in red and purple refer to contribution from Sc and O atoms, respectively. The size of the data points indicates the spectral weight. Zero is taken to be Fermi energy.

### C. Orbital-Projected Band Structures of T-ScO<sub>2</sub> Monolayer, T-ScO<sub>2</sub> Bilayer, H-ScO<sub>2</sub> Monolayer & H-ScO<sub>2</sub> Monolayer

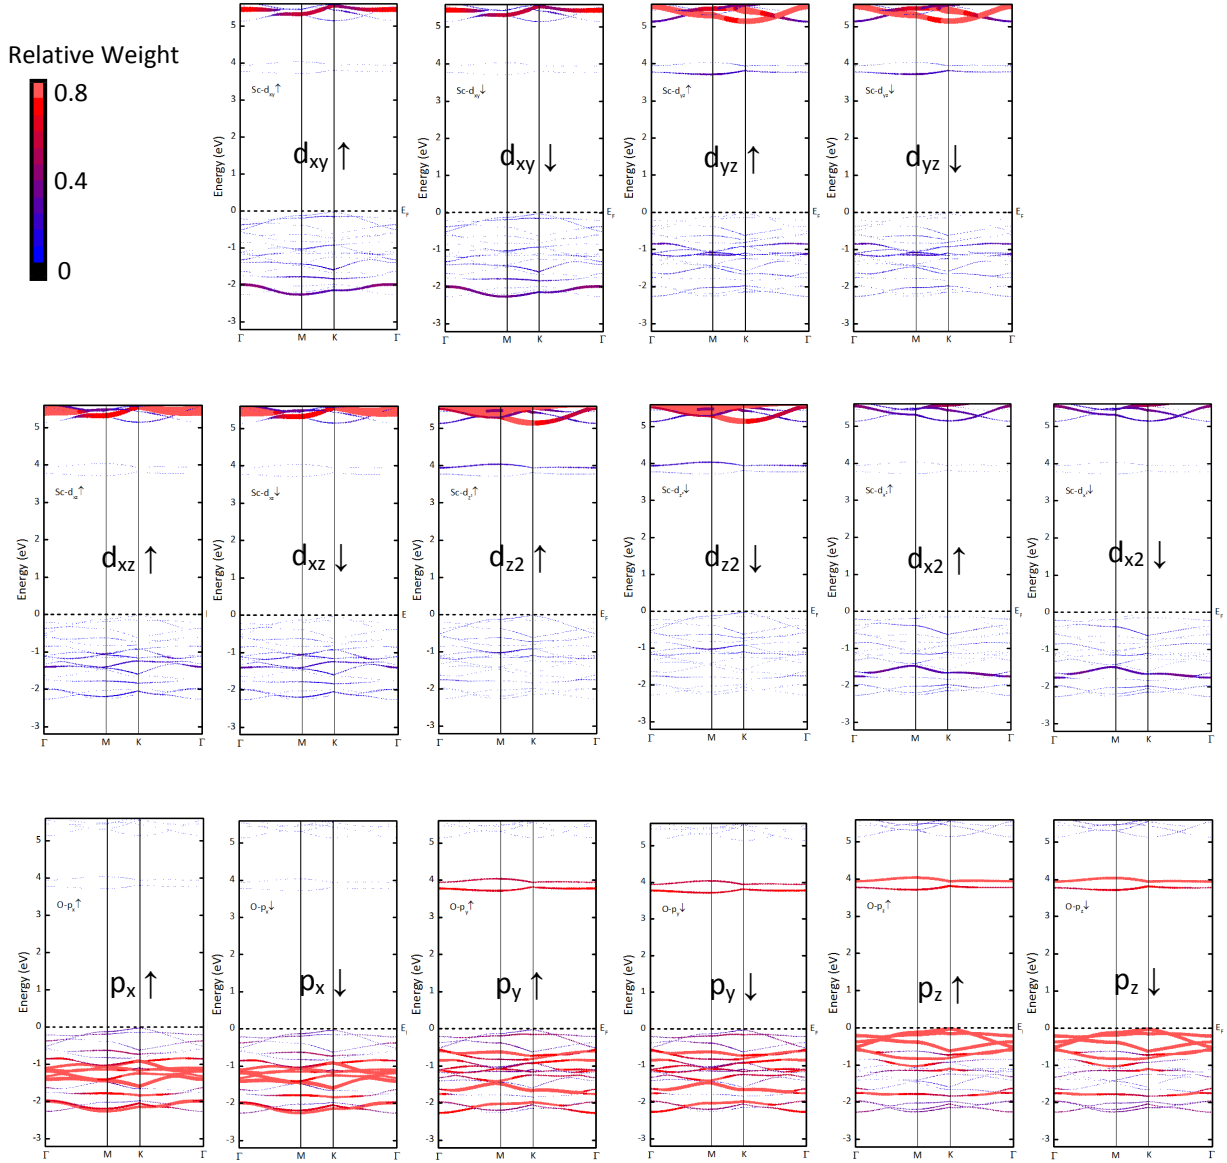

Figure S4. Orbital-projected band structure of T-ScO<sub>2</sub> monolayer. The size and color of the data points indicates the spectral weight. Zero is taken to be Fermi energy.

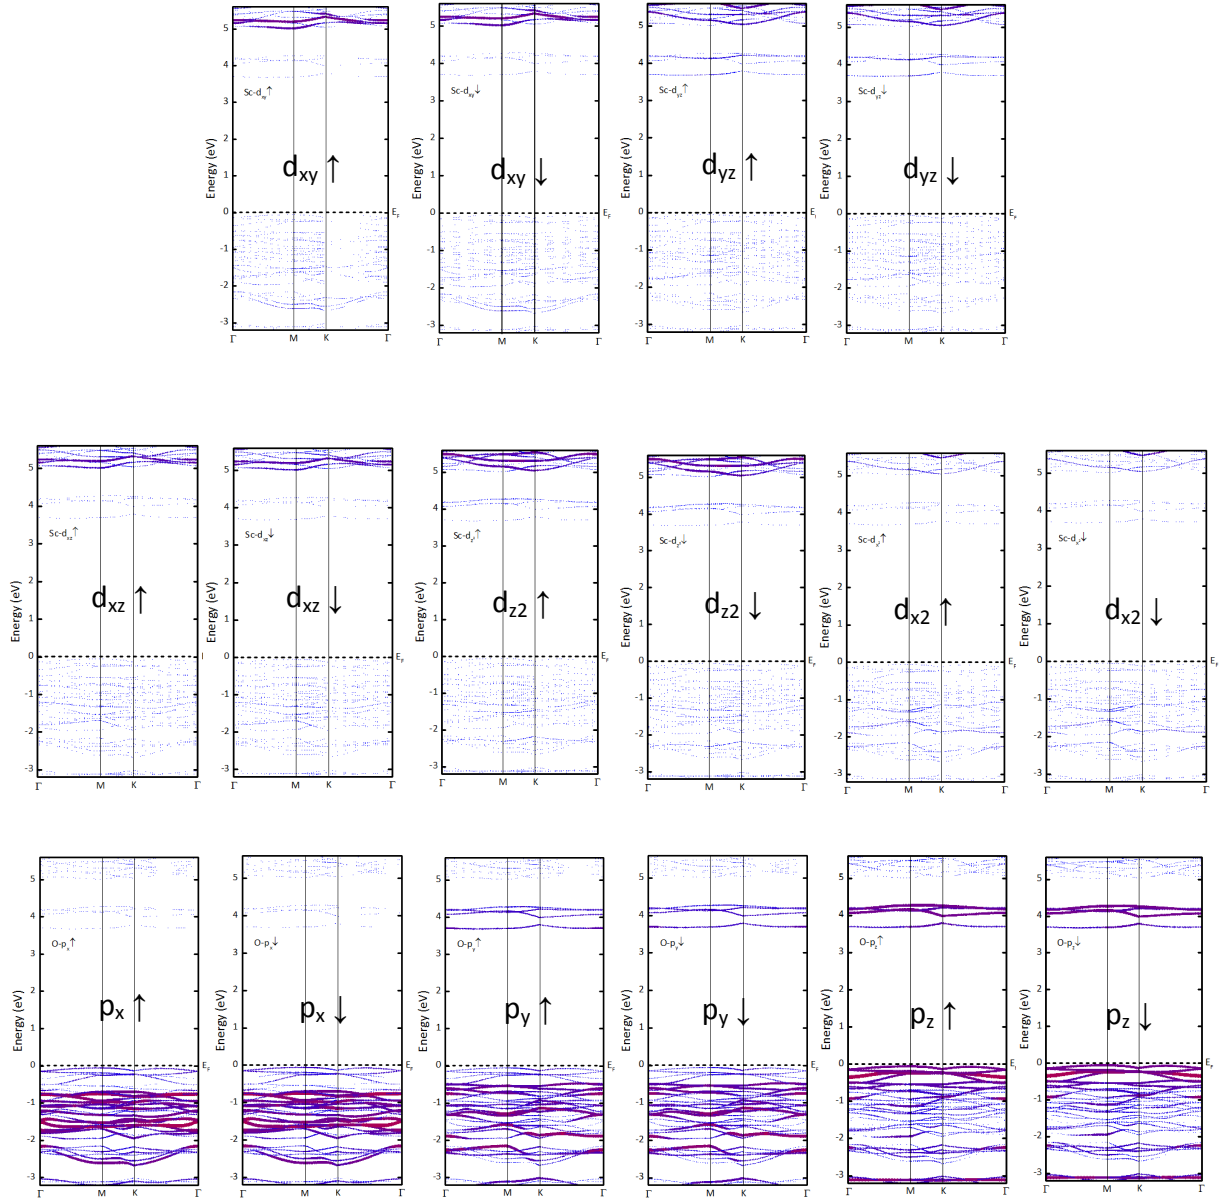

Figure S5. Orbital-projected band structure of T-ScO<sub>2</sub> bilayer. The size and color of the data points indicates the spectral weight. Zero is taken to be Fermi energy.

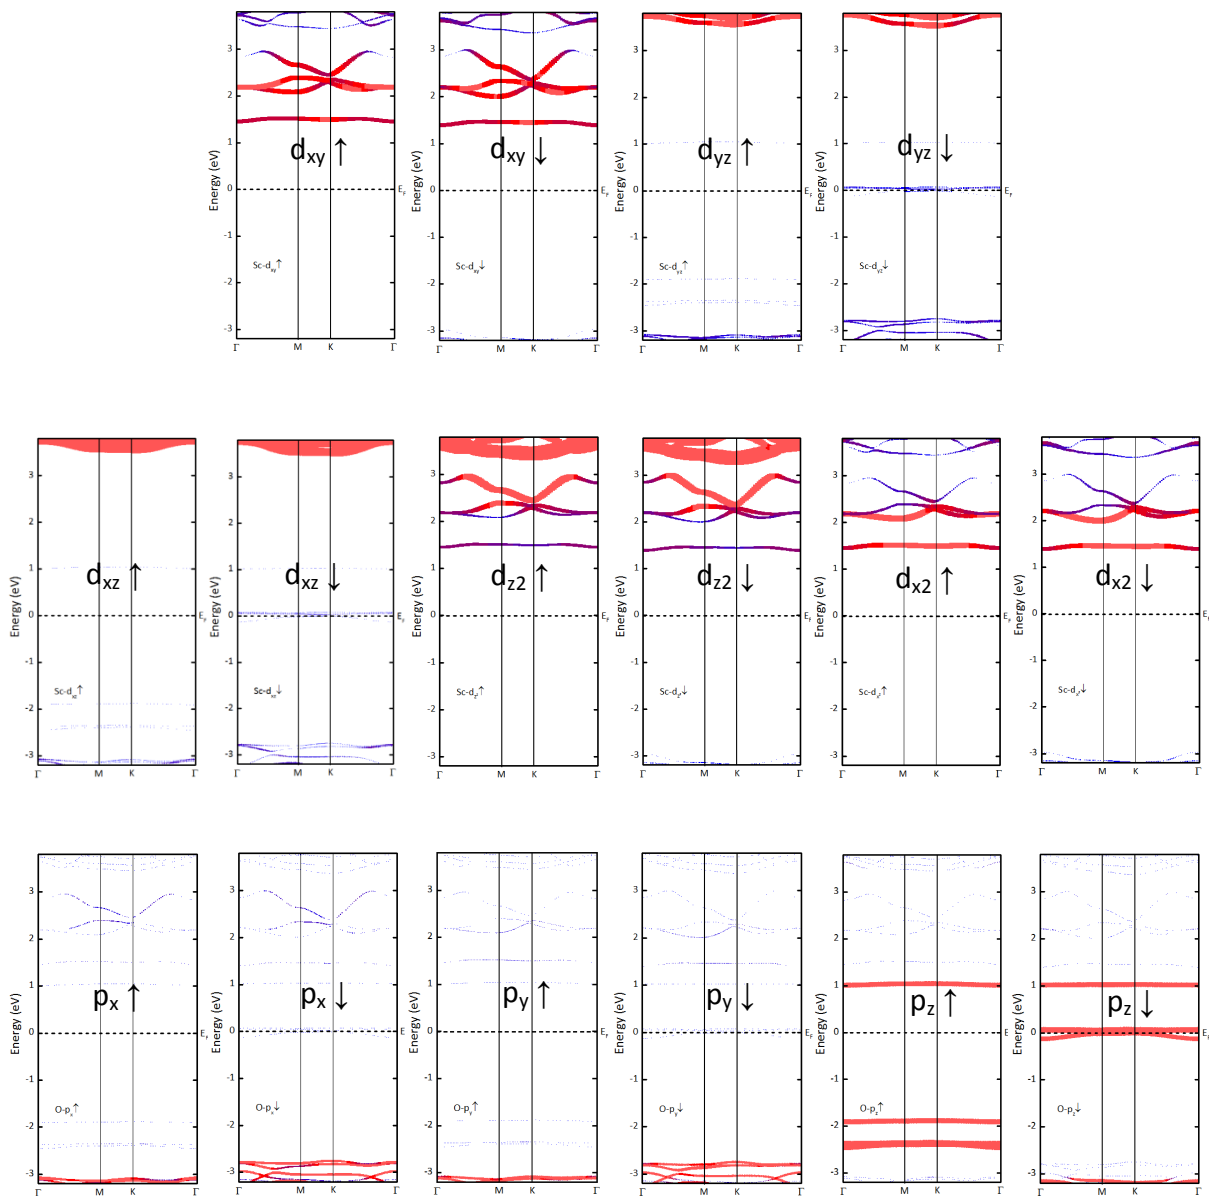

Figure S6. Orbital-projected band structure of H-ScO<sub>2</sub> monolayer. The size and color of the data points indicates the spectral weight. Zero is taken to be Fermi energy.

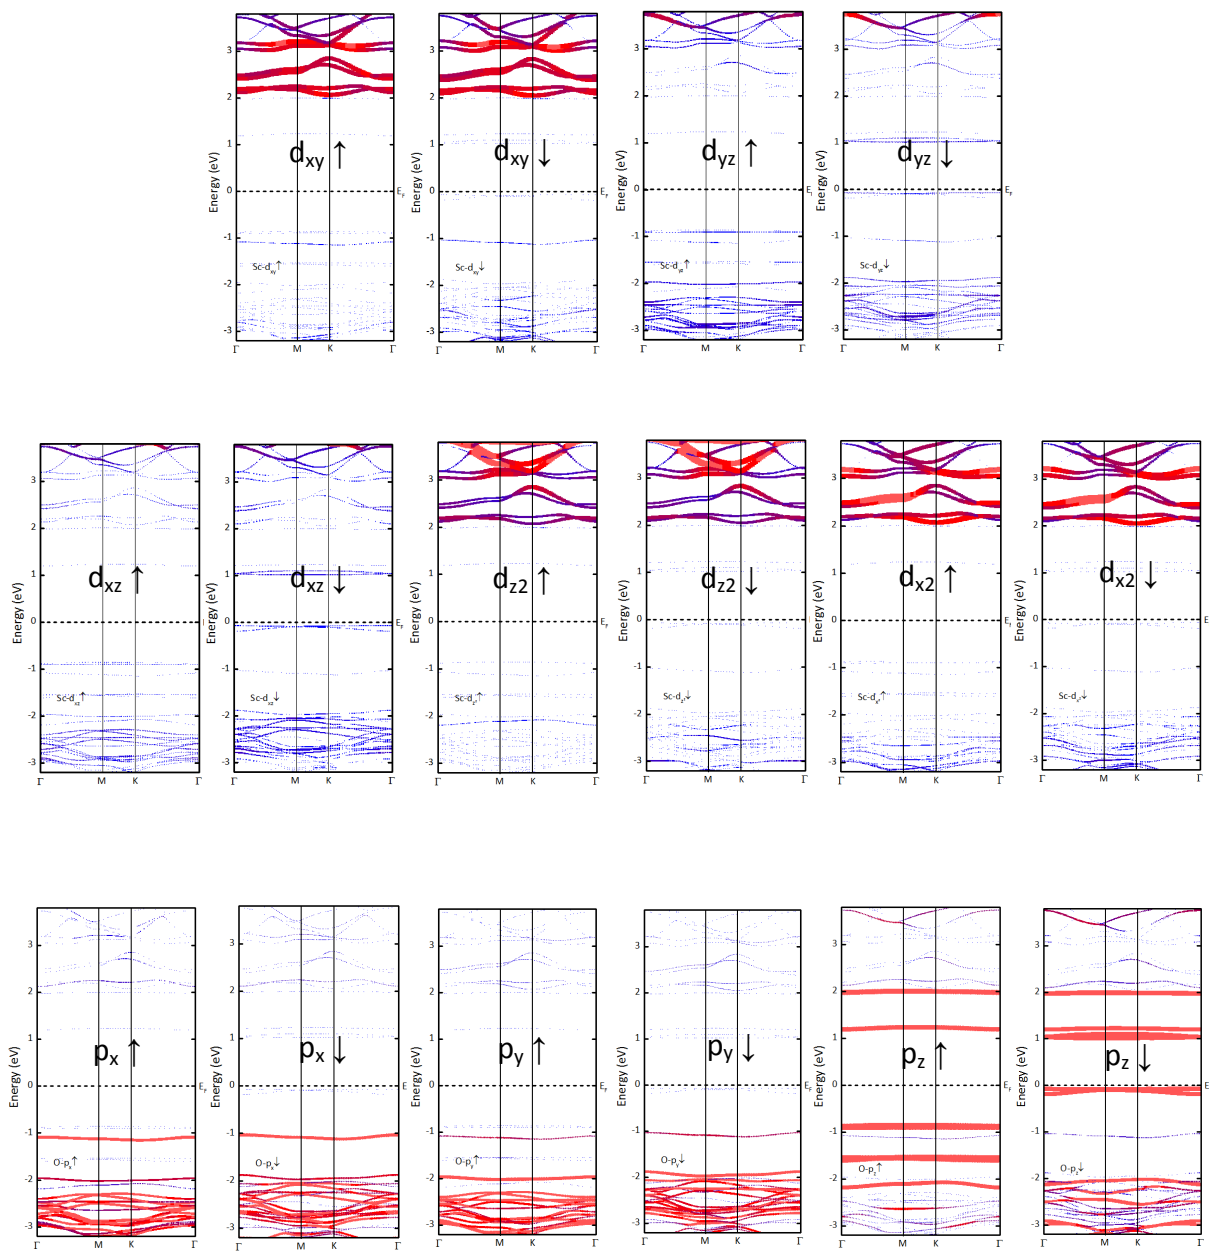

Figure S7. Orbital-projected band structure of H-ScO<sub>2</sub> bilayer. The size and color of the data points indicates the spectral weight. Zero is taken to be Fermi energy.

## D. Laplacian of Charge Density

The Laplacian refers to the mathematical operator which is the second derivative or the trace of the Hessian of a function; it denotes the local minimum/maximum, or in other words, the saddle point of that function. Both minimum and maximum points are *critical points* at which the first derivatives of the function become zero. In the context of chemical topology, the differential operator reproduces the spherical shell structure of isolated atoms by alternating shells of charge concentration and shells of charge depletion. The outermost shell of charge concentration of an atom is called the valence shell charge concentration (VSCC), and its spherical symmetry is broken when the atom bonds with another atom. Another feature in the Laplacian plot of the electron density is the nuclear critical point (NCP), which is a local maximum in electron density, and is typically located at the position of a nucleus. A zero-flux surface contains a set of Laplacian trajectories which terminate at the bond critical point (bcp) where the Laplacian equals zero.



## E. Evolution of Spin Density Distribution in H-ScO<sub>2</sub> Bilayer with Interlayer Separation

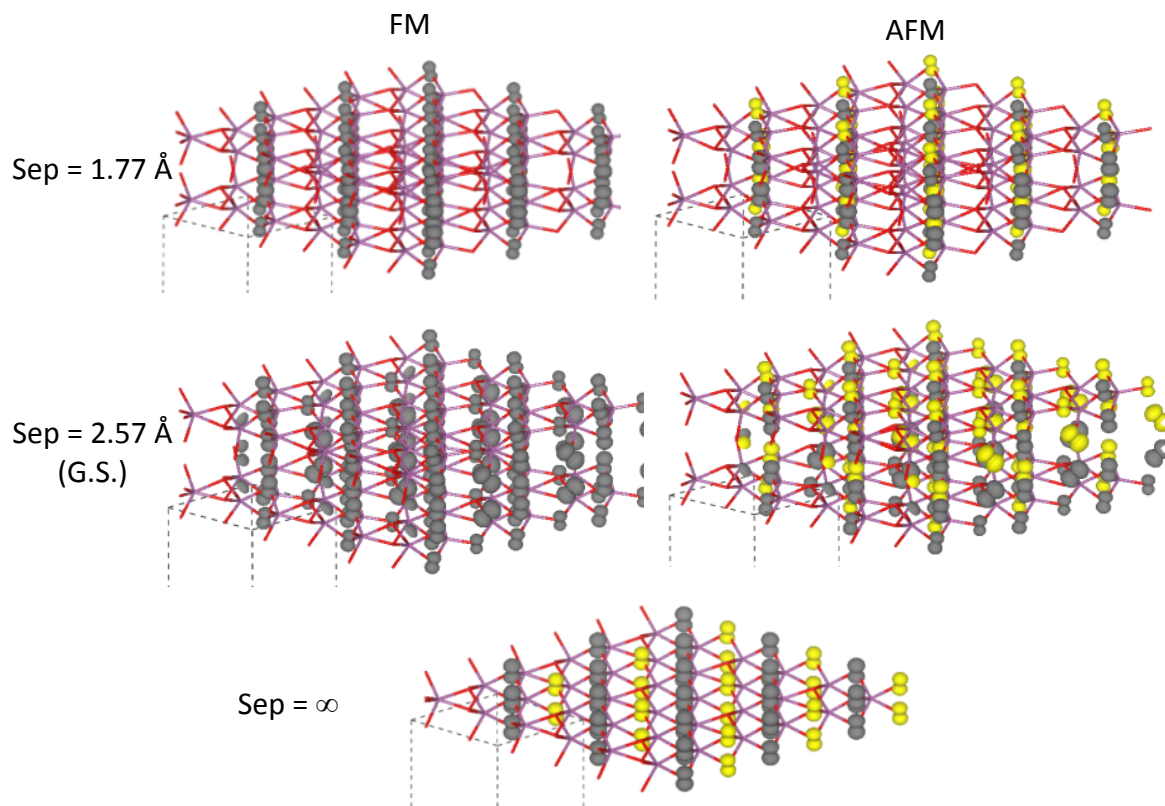

Figure S8. Evolution of spin density distribution in H-ScO<sub>2</sub> bilayer with interlayer separation in the FM and AFM spin configurations. The contour isovalue is  $0.01 e/\text{Å}^3$ . Regions in grey have a net spin-up density, whereas those in yellow have a net spin-down density.
